# Supplementary material
Source: publisher site journal article supplement (https://www.spandidos-publications.com/3082/downloadSupplementary)

Figure S1. Overexpression of LINC01535 promotes CRC cell proliferation (left; scale bar, 1 cm) and invasion (right; scale bar, 1  $\mu$ m). LINC, long intergenic non-coding RNA.

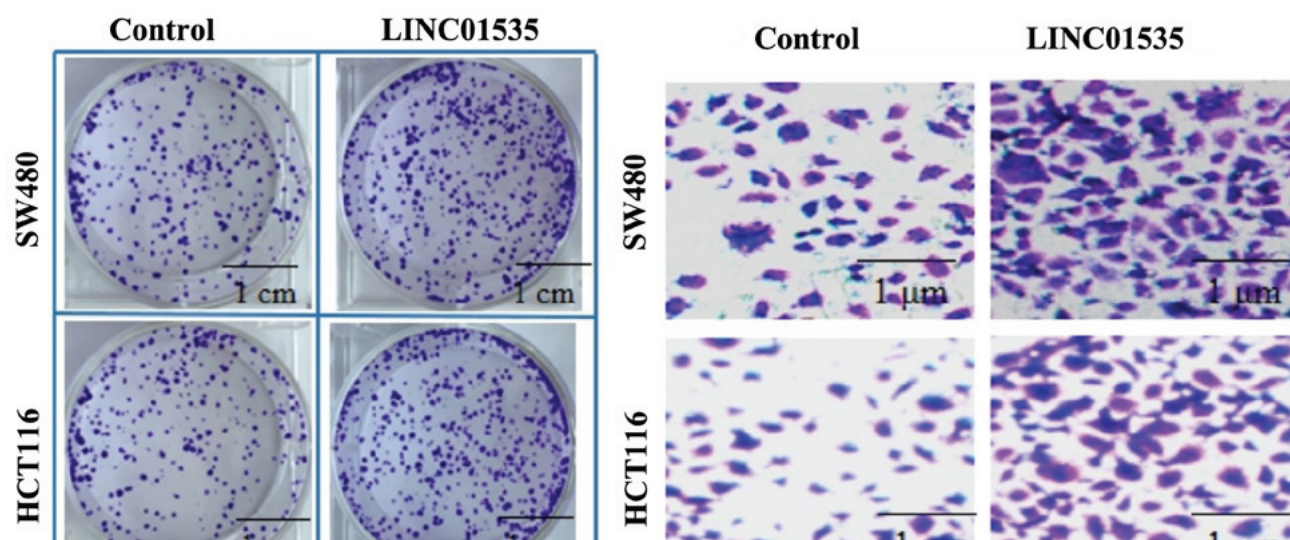

Supplement: Supplementary file 1 [file downloadSupplementary]
